# Supplementary material for: A phase-transfer crystallization pathway to synthesize ultrasmall silicoaluminophosphate for enhanced catalytic conversion of dimethylether-to-olefin
Source: Royal Society of Chemistry journal article supplement (doi:10.1039/c8ce01752b), 2018-11-30
Supplement: c8ce01752b1.pdf [file c8ce01752b1.pdf]

Electronic Supporting Information for:

**A phase-transfer crystallization pathway to synthesize  
ultrasmall silicoaluminophosphate for enhanced catalytic  
conversion of dimethylether-to-olefin†**

**Hongxin Ding<sup>a</sup>, Jiajia Ding<sup>b</sup>, Wei Liu<sup>b</sup>, Xiaoling Zhao<sup>a</sup>, Qijin Chi<sup>c</sup>, Kake Zhu<sup>a\*</sup>,  
Xingguo Zhou<sup>a</sup>, Weimin Yang<sup>b\*</sup>**

*<sup>a</sup>State Key Laboratory of Chemical Engineering, East China University of Science and Technology, Shanghai 200237, P. R. China.*

*<sup>b</sup>Shanghai Research Institute of Petrochemical Technology, Sinopec, Shanghai 201208, P. R. China.*

*<sup>c</sup>Department of Chemistry, Technical University of Denmark, Kemitorvet Building 207, DK-2800 Kongens Lyngby, Denmark*

## Table of contents

| Index                                                                                                                                                                                                     | Page |
|-----------------------------------------------------------------------------------------------------------------------------------------------------------------------------------------------------------|------|
| <b>A. Synthesis details</b>                                                                                                                                                                               | S4   |
| <b>B. Characterization techniques</b>                                                                                                                                                                     | S4   |
| <b>C. Diffusivity measurements</b>                                                                                                                                                                        | S6   |
| <b>D. Catalytic assessment and carbon deposit analyses</b>                                                                                                                                                | S6   |
| <b>E. Supplementary Figures and Tables</b>                                                                                                                                                                | S7   |
| Fig. S1 High magnification FE-SEM images of SAPO-34-N.                                                                                                                                                    | S8   |
| Fig. S2 XRD patterns & relative crystallinity for SAPO-34-C, SAPO-34-S-W-T, SAPO-34-D-W, SAPO-34-N, SAPO-34-PB-D-W, SAPO-34-PB-D-W-T, SAPO-34 W:T=50:3.2, SAPO-34 W:T=50:13 and SAPO-34 W:T=25:6.5.       | S9   |
| Fig. S3 SEM images of SAPO-34-C, SAPO-34-S-W-T, SAPO-34-D-W, SAPO-34-N, SAPO-34-PB-D-W, SAPO-34-PB-D-W-T, SAPO-34 W:T=50:3.2, SAPO-34 W:T=50:13, SAPO-34 W:T=25:6.5.                                      | S10  |
| Fig. S4 Photographs of time-dependent products of SAPO-34-N and SAPO-34-C crystallization process, and GC-MS of supernatant upper part of mother liquor of SAPO-34-C-72h after centrifugation.            | S11  |
| Fig. S5 Dynamic Light Scattering measurements of early stage and final stage of solid dispersion at varied crystallization time for SAPO-34-N and SAPO-34-C formation.                                    | S12  |
| Fig. S6 XRD patterns of the solid products collected at different time points of SAPO-34-N, SAPO-34-C, relative crystallinity evolution with crystallization time, and time-dependent FT-IR of SAPO-34-N. | S13  |
| Fig. S7 SEM images of SAPO-34-C-0.5h, SAPO-34-C-1h, SAPO-34-C-2h, SAPO-34-C-3h, SAPO-34-C-6h, SAPO-34-C-9h, SAPO-34-C-12h, SAPO-34-C-24h, SAPO-34-C-48h, SAPO-34-C-72h.                                   | S14  |
| Fig. S8 SEM images of SAPO-34-N-0.5h, SAPO-34-N-1h, SAPO-34-N-2h, SAPO-34-N-3h, SAPO-34-N-6h, SAPO-34-N-9h, SAPO-34-N-12h, SAPO-34-N-24h, SAPO-34-N-48h, SAPO-34-N-72h.                                   | S15  |
| Fig. S9 TEM images of SAPO-34-N-0.5h, SAPO-34-N-1h, SAPO-34-N-2h, SAPO-34-N-24h, SAPO-34-N-48h.                                                                                                           | S17  |
| Fig. S10 Chemical composition variations of inorganic components in solid product during crystallization process                                                                                          | S18  |

|                                                                                                           |     |
|-----------------------------------------------------------------------------------------------------------|-----|
| Fig. S11 Time on stream $C_2H_4/C_3H_6$ of DTO for SAPO-34-N and SAPO-34-C.                               | S19 |
| Fig. S12 Coke amounts determined via Thermal gravimetric analysis (TGA) measurement from spent catalysts. | S20 |
| Fig. S13 GC-MS detection of entrapped hydrocarbon species from spent catalysts after DTO reaction.        | S21 |
| Table S1 Detailed synthetic procedures of all                                                             | S22 |
| Table S2 DTO catalytic results of SAPO-34-C and SAPO-34-N catalysts                                       | S23 |

## A. Materials and methods

**Materials:** The reagents used were aluminum isopropoxide (AIP, >98 %, TCI), phosphoric acid (85 wt%, Shanghai Lingfeng Chemical Reagent Co. Ltd.), tetraethylammonium hydroxide (TEAOH) (35 wt%, Shanghai Cainorise Chemicals Co., Ltd), tetraethyl orthosilicate (TEOS, 28 wt % SiO<sub>2</sub>, Shanghai Lingfeng Chemical Reagent Co. Ltd), toluene (>99.8 wt %, Shanghai Lingfeng Chemical Reagent Co. Ltd).

**Synthesis procedure:** SAPO-34-N was prepared using a phase-transfer synthesis process. The molar composition ratio of the synthesis gel was 1.0 Al<sub>2</sub>O<sub>3</sub>: 1.0 P<sub>2</sub>O<sub>5</sub>: 0.3 SiO<sub>2</sub>: 2.0 TEAOH: 50 H<sub>2</sub>O: 6.5 toluene. In a typical synthesis, 2.19 g TEOS was mixed with 3.84 g H<sub>3</sub>PO<sub>4</sub> and 3.76 g deionized water to form a mixture, to which 14.03 g TEAOH was added dropwise after 2 h stirring. The mixture was further stirred for 4 h and named solution A. In another beaker, 6.81 g AIP was dissolved in 10.00 g toluene by mechanical stirring for 3 h to produce solution B. Solutions A and B were mixed and transferred to a 100 mL Teflon lined stainless steel autoclave for crystallization. Crystallization was conducted at 473 K under tumbling of 50 rpm for 48 h. The product was centrifuged, washed thoroughly with water before drying at 353 K for 6 h, followed by calcination at 823 K for 6 h. To investigate the crystallization, part of the gel was sampled at various crystallization intervals and denoted by using synthesis time as suffix. For example, SAPO-34-N-12h represent the sample was hydrothermally treated for 12h.

Conventional counterpart SAPO-34-C was derived from aqueous static crystallization otherwise identical crystallization conditions as that of SAPO-34-N. A series of controlled experiments SAPO-34-D-W derived from aqueous dynamic crystallization, and SAPO-34-S-W-T prepared from water-toluene biphasic media under static crystallization, SAPO-34-PB-D-W derived from aqueous dynamic crystallization from pseudoboehmite, and SAPO-34-PB-D-W-T prepared from water-toluene biphasic media using pseudoboehmite as precursor under otherwise identical crystallization conditions as that of SAPO-34-N; SAPO-34-W:T=50:3.2& SAPO-34-W:T=50:13 just turn water toluene ratio from 50:3.2 to 50:13 under otherwise identical crystallization conditions as that of SAPO-34-N. Detailed synthetic procedures are tabulated in Table S3.

## B. Characterization techniques

X-ray diffraction (XRD) patterns were gathered using a Rigaku 2550VB/PC

diffractometer operating at 40 kV and 100 mA with Cu K $\alpha$  X-ray source ( $\lambda = 1.5418$  Å).

Scanning electron microscopy (SEM) were captured on NOVA Nano SEM 450 (FEI) and Gemini SEM 500 (Carl Zeiss) and transmission electron microscopy (TEM) were captured on images JEL-2011 (JEOL) instruments.

N<sub>2</sub> physisorption measurements were conducted on an ASAP 2020 HD (Micromeritics, USA) analyzer at 77 K, all samples were degassed at 623 K for 24 h under vacuum before measurements. The surface areas were determined by the Brunauer-Emmett-Teller (BET) method. Micropore volumes and surfaces were derived from a *t*-plot approach, pore size distribution was derived from adsorption branch using Barret-Joyner-Halenda (BJH) method, and the total pore volume values were estimated by the adsorption at a relative pressure  $p/p_0 = 0.99$ .

Ammonium temperature programmed desorption (NH<sub>3</sub>-TPD) measurements were performed on an AutoChem II (Micromeritics, USA) analyzer. The samples were pretreated at 873 K for 1 h under He flow before saturated with ammonium at 373 K. The profiles collected between 373 K and 873 K at a ramp of 10 K·min<sup>-1</sup>.

Elementary compositions were measured by inductively coupled plasma optical emission spectrometry (ICP) on an IRIS 1000 instrument.

Dynamic Light Scattering (DLS) measurements were performed on NICOMP 380 ZLS instrument.

<sup>29</sup>Si, <sup>27</sup>Al and <sup>31</sup>P solid state magic angle spinning nuclear magnetic resonance (MAS NMR) measurements were obtained on a Varian 400 spectrometer, 4 mm ZrO<sub>2</sub> rotors with a spinning rate of 8-10 kHz at room temperature. <sup>27</sup>Al MAS NMR spectra were recorded at a resonance frequency of 104.26 MHz. <sup>27</sup>Al chemical shifts were reported relative to 0.1 M aqueous Al(NO<sub>3</sub>)<sub>3</sub> solution. <sup>29</sup>Si and <sup>31</sup>P MAS NMR measurements were performed at a resonance frequency of 79.49 MHz and 161.98MHz, respectively. The ppm scale was referenced to Si(CH<sub>3</sub>)<sub>4</sub> for <sup>29</sup>Si and (NH<sub>4</sub>)H<sub>2</sub>PO<sub>4</sub> for <sup>31</sup>P.

FT-IR spectra were obtained with a Nicolet 6700 instrument. 1 mg sample was mixed with 99 mg KBr powder to prepare self-support pellets used for FT-IR measurement.

Diffuse reflectance infrared Fourier-transform spectra (DRIFTS) were recorded using a Nicolet 380 spectrometer at 4 cm<sup>-1</sup> resolutions. Prior to measurement, catalysts were first activated at 674 K under vacuum for 2h. The background spectrum recorded under identical operating conditions except in the absence of a sample in the

cell, was always automatically subtracted from measured spectra.

Gas chromatography-mass spectrometry (GC-MS) were performed on a Agilent 7890B GC/5977B, equipped with MSD&CTC Analytics, 2 mL sample was headspace injected after 363 K for 30 min.

### C. Diffusivity measurements

The diffusivity of propylene in the SAPO-34 samples was measured by gravimetric analysis, using an Intelligent Gravimetric Analyzer, model IGA-100, from Hiden Analytical Ltd., Warrington, UK. The system consists of a fully computerized microbalance, which automatically measures the weight of the sample sorbents as a function of time with the gas vapor pressure and sample temperature under computer control. The sensitivity of the microbalance was 1  $\mu\text{g}$ . The calcined sample (0.10 g) was pretreated at a pressure of  $< 10^{-6}$  Pa and 573 K in a  $\text{N}_2$  atmosphere for 3 h to remove adsorbed impurities until the sample held a constant weight. Afterwards, the sample was cooled to 365 K and the contacting gas was replaced by a preset amount of gaseous mixture, consisting of propylene and  $\text{N}_2$  ( $\text{N}_2$  saturated with propylene at 323 K, 100 mL/min). Isotherms and the corresponding kinetics of adsorption and desorption were determined at varied partial pressure ( $P/P_0 = 0-1$ ) steps.

To quantify to which extent diffusion resistance was mitigated by reduction of crystal size, diffusion measurements were carried out with propylene as a representative adsorbate. The effective diffusivity was estimated using Fick's second law, which expresses the concentration variation of molecules inside a porous slab (assumed infinitely extended in the transverse direction) as a function of exposure time:

$$\frac{\partial C}{\partial t} = D_{\text{eff}} \left( \frac{\partial^2 C}{\partial x^2} \right) \quad (1)$$

where  $C$  is the concentration of propylene inside the particle,  $t$  is time,  $D_{\text{eff}}$  is the diffusivity, and  $x$  is the distance, measured from the center of a slab.

At the beginning of adsorption process in a slab-like crystal, the solution of this equation can be well approximated

$$\frac{q(t)}{q(\infty)} = \frac{6}{\sqrt{\pi}} \sqrt{\frac{D_{\text{eff}}}{L^2}} \sqrt{t} \quad (2)$$

where  $q(t)/q(\infty)$  is the normalized hydrocarbon uptake and  $L$  is the characteristic diffusion length.

### D. Catalytic assessment and carbon deposit analyses

Dimethyl ether to olefin conversion (DTO) was carried out on a fix bed reactor at atmospheric pressure. 100 mg catalyst (60-80 mesh) was preheated at 823 K for 3h under N<sub>2</sub> flow before reaction. Reaction temperature was 723 K and the dimethyl ether weight hourly space velocity (WHSV) was 2 h<sup>-1</sup>. The products were analyzed by an on-line gas chromatograph equipped with a flame ionization detector (FID) and Plot-Q column (Agilent J&W GC Columns, HP-PLOT/Q 19091P-Q04, 30 m × 320 μm × 20 μm). The conversion and selectivity were calculated on CH<sub>2</sub> basis and methanol was considered as reactant in the calculation.

$$\text{DME conversion} = \frac{1 - (\text{C-atoms of DME}_{\text{output}})}{(\text{C-atoms of DME}_{\text{input}})} \times 100 \quad (3)$$

$$\text{Product selectivity} = \frac{\text{C-atoms of the product}}{\text{C-atoms of DME}_{\text{input}} - \text{C-atoms of DME}_{\text{output}}} \quad (4)$$

Coke amounts determined via Thermal gravimetric analysis (TGA) measurement and the corresponding GC-MS detection of entrapped hydrocarbon species from spent catalysts TGA was carried out on a Perkin-Elmer Pyris 1 TG analyzer at a heating rate of 10 K min<sup>-1</sup> from room temperature to 800 °C in air. GC-MS were conducted on Agilent 7890A GC/5975C MSD with HP-5MS column (30 m × 250 μm × 0.25 μm) after flash at 1023 K by PY-2020iD (Frontier Lab).

## E. Supplementary Figures and Tables

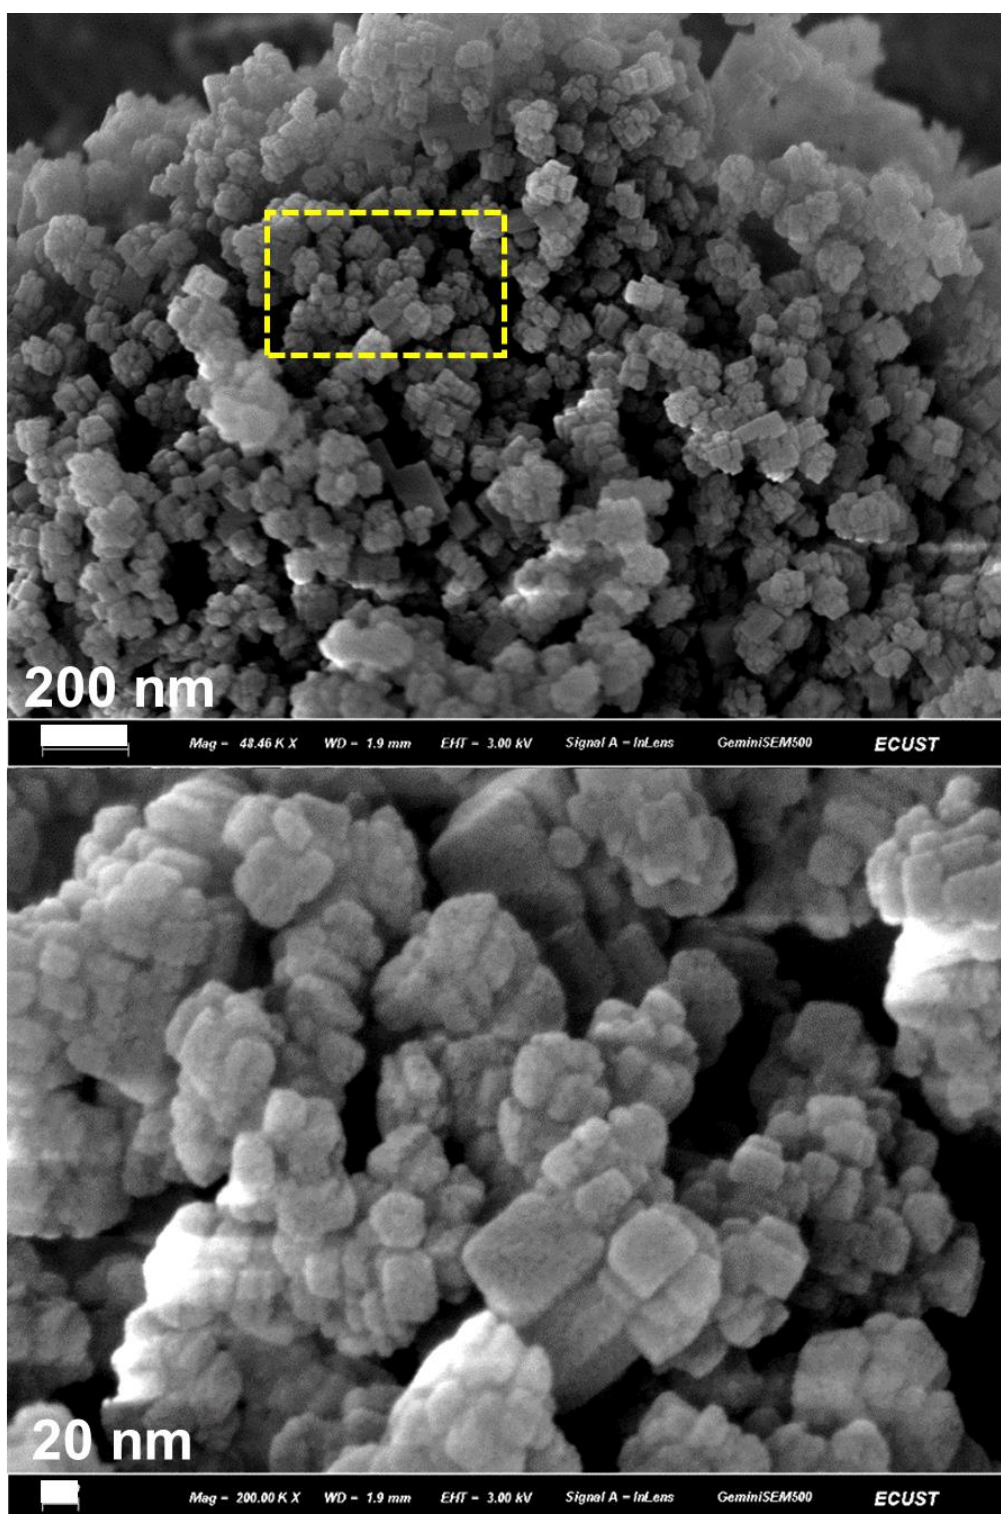

**Fig. S1** High magnification FE-SEM images of SAPO-34-N.



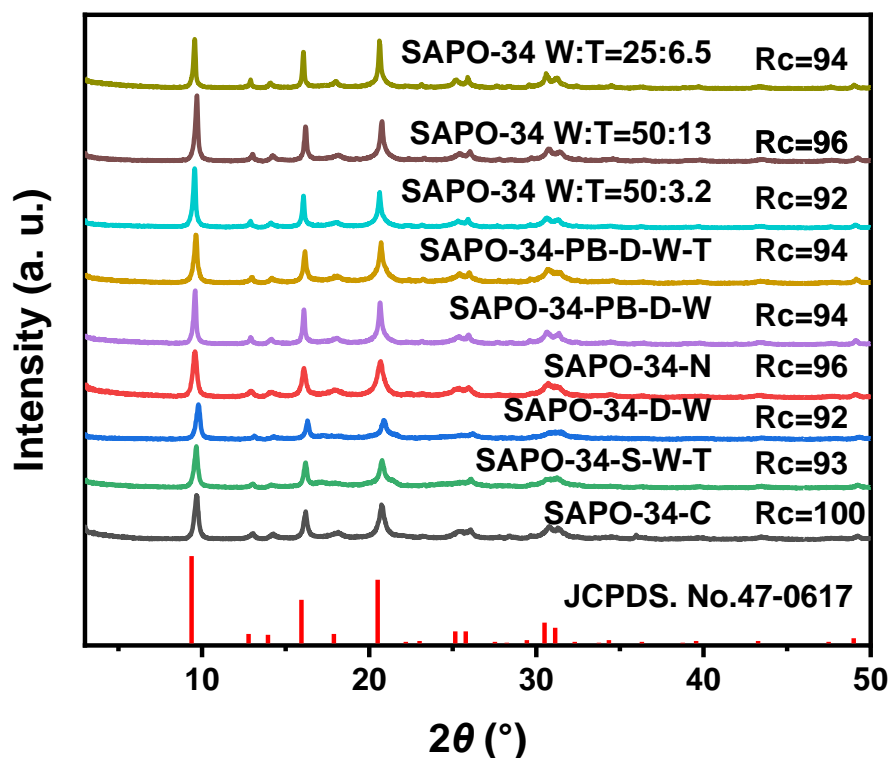

**Fig. S2** XRD patterns & relative crystallinity <sup>a</sup> for SAPO-34-C, SAPO-34-S-W-T, SAPO-34-D-W, SAPO-34-N, SAPO-34-PB-D-W, SAPO-34-PB-D-W-T, SAPO-34 W:T=50:3.2 and SAPO-34 W:T=50:13. <sup>b</sup>

<sup>a</sup> Relative crystallinity calculation based on the area of peaks at  $2\theta = 9.5, 16.0, 20.5, 25.8$  and  $30.50^\circ$ , the relative crystallinity of fully crystallized SAPO-34-C.

<sup>b</sup> SAPO-34-N derived from water-toluene biphasic synthesis using AIP as precursor (SAPO-34-N), SAPO-34-C derived from aqueous static crystallization, SAPO-34-D-W derived from aqueous dynamic crystallization, and SAPO-34-S-W-T prepared from water-toluene biphasic media under static crystallization otherwise identical crystallization conditions as that of SAPO-34-N. SAPO-34-PB-D-W derived from aqueous dynamic crystallization using PB as precursor, SAPO-34-PB-D-W-T derived from water-toluene biphasic synthesis; SAPO-34 W:T=50:3.2, 50:13 & SAPO-34 W:T=25:6.5 just turn water toluene ratio from 50:3.2, 50:13 to 25:6.5.

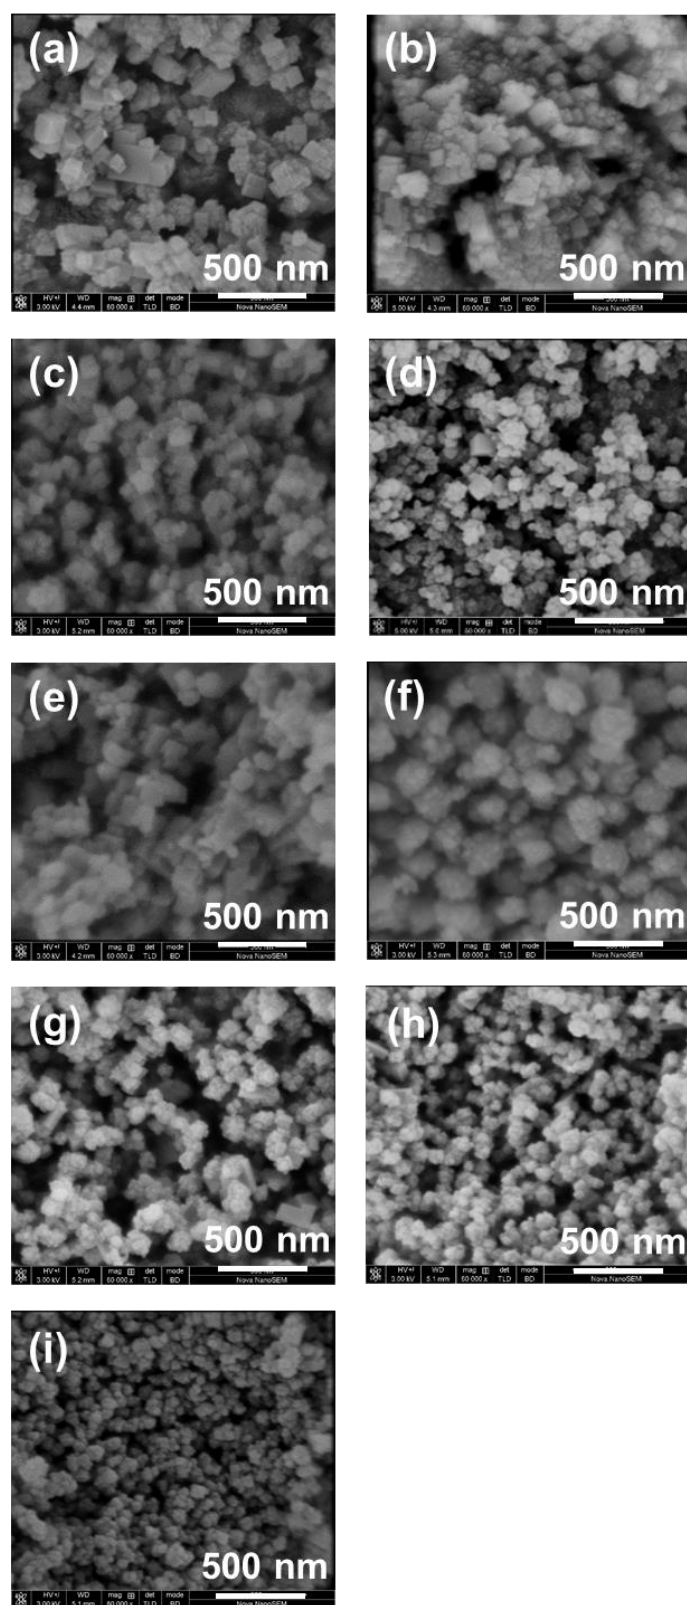

**Fig. S3** SEM images of SAPO-34-C (a); SAPO-34-S-W-T (b); SAPO-34-D-W (c); SAPO-34-N (d); SAPO-34-PB-D-W (e); SAPO-34-PB-D-W-T (f); SAPO-34-W:T=50:3.2 (g); SAPO-34-W:T=50:13 (h), SAPO-34-W:T=25:6.5 (i)

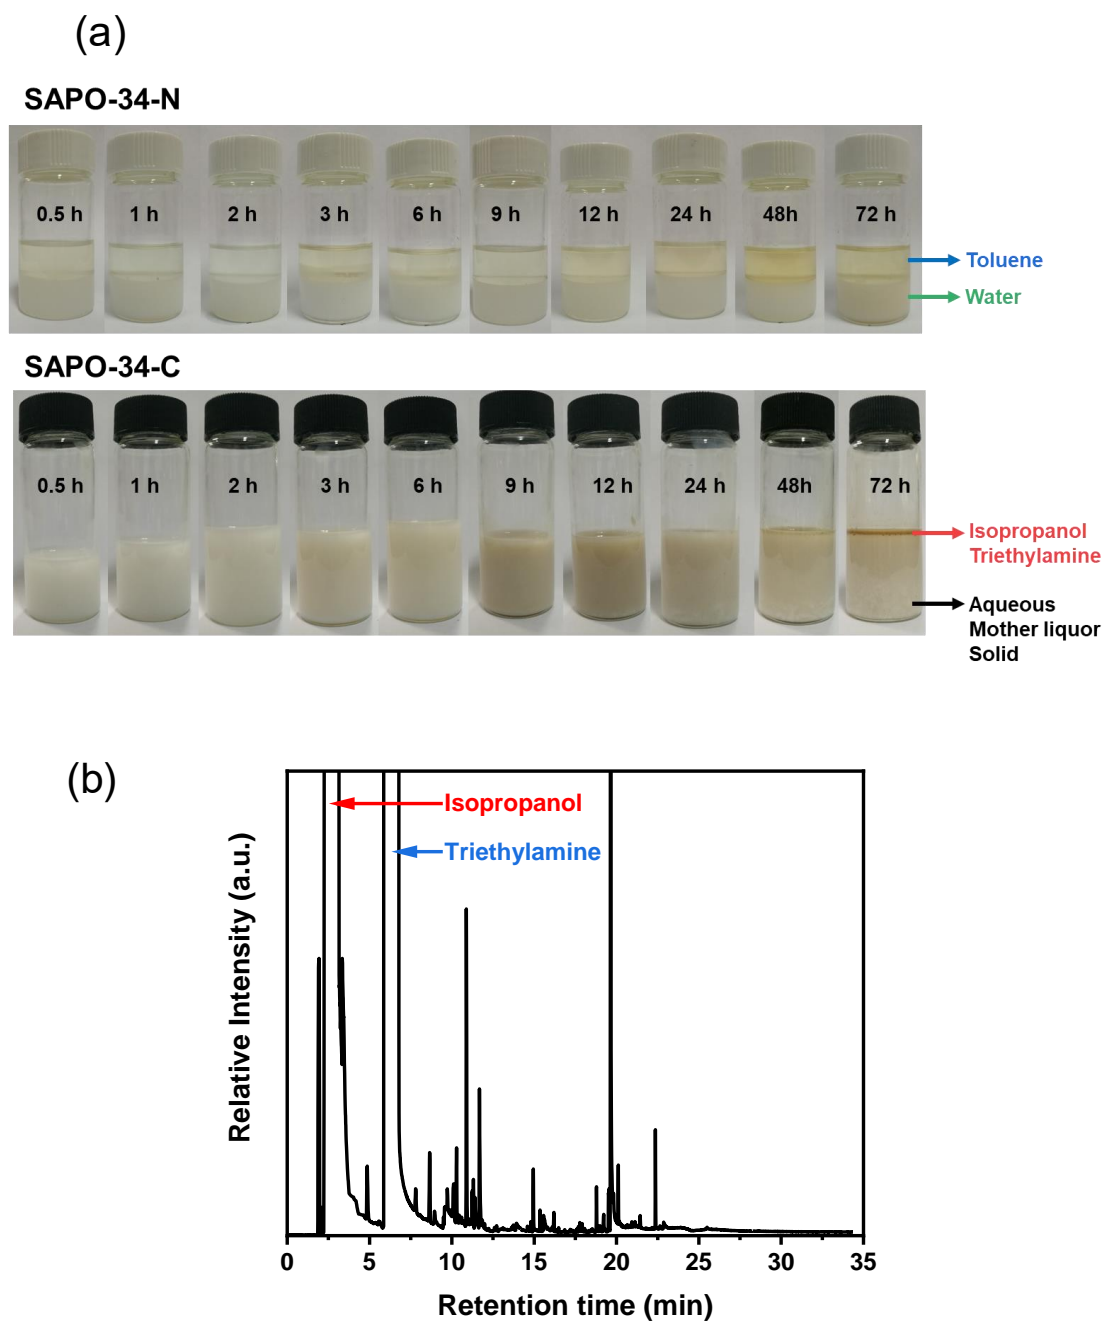

**Fig. S4** Photographs of time-dependent products of SAPO-34-N and SAPO-34-C crystallization process (a), and GC-MS of supernatant upper part of mother liquor of SAPO-34-C-72h after centrifugation (b).

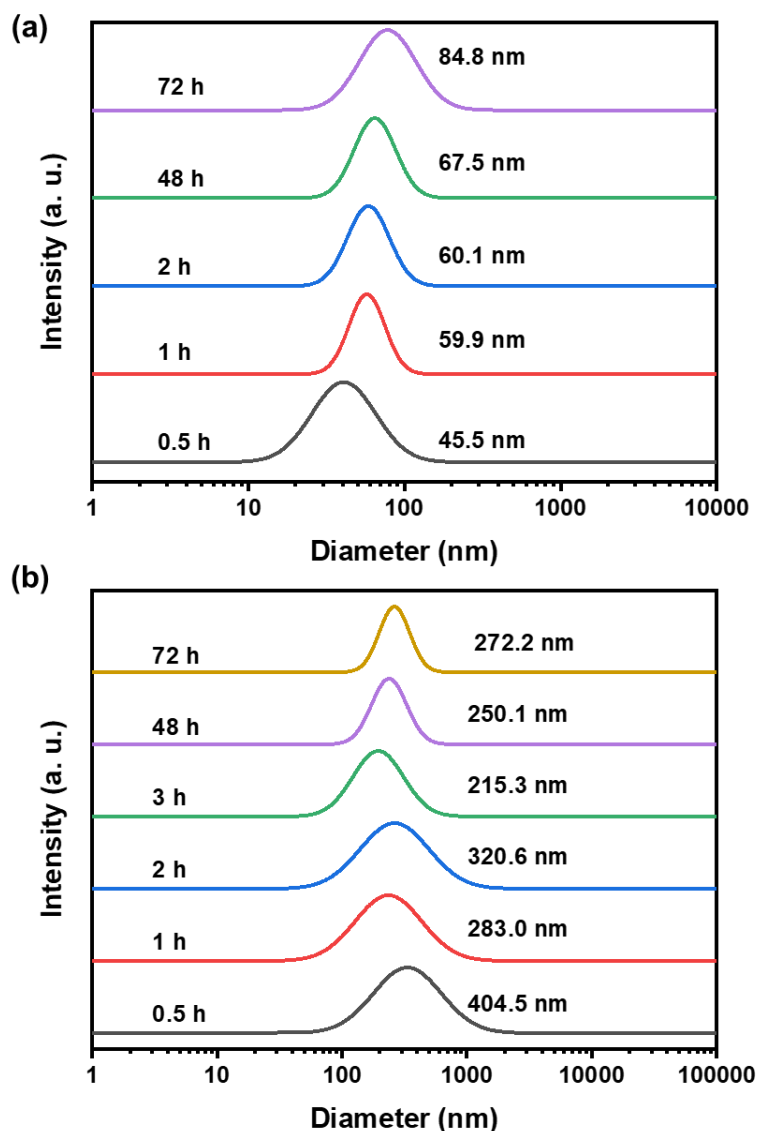

**Fig. S5** Dynamic Light Scattering measurements of early stage and final stage of solid dispersion at varied crystallization time for SAPO-34-N (a) and SAPO-34-C (b) formation. <sup>a</sup>

<sup>a</sup> Particle dispersion index of SAPO-34-N-0.5h = 0.211, SAPO-34-N-1h = 0.070, SAPO-34-N-2h = 0.096, SAPO-34-N-48h = 0.091, SAPO-34-N-72h = 0.175, SAPO-34-C-0.5h = 0.391, SAPO-34-C-1h = 0.375, SAPO-34-C-2h = 0.399, SAPO-34-C-2h = 0.218, SAPO-34-C-48h = 0.105, SAPO-34-C-72h = 0.078.

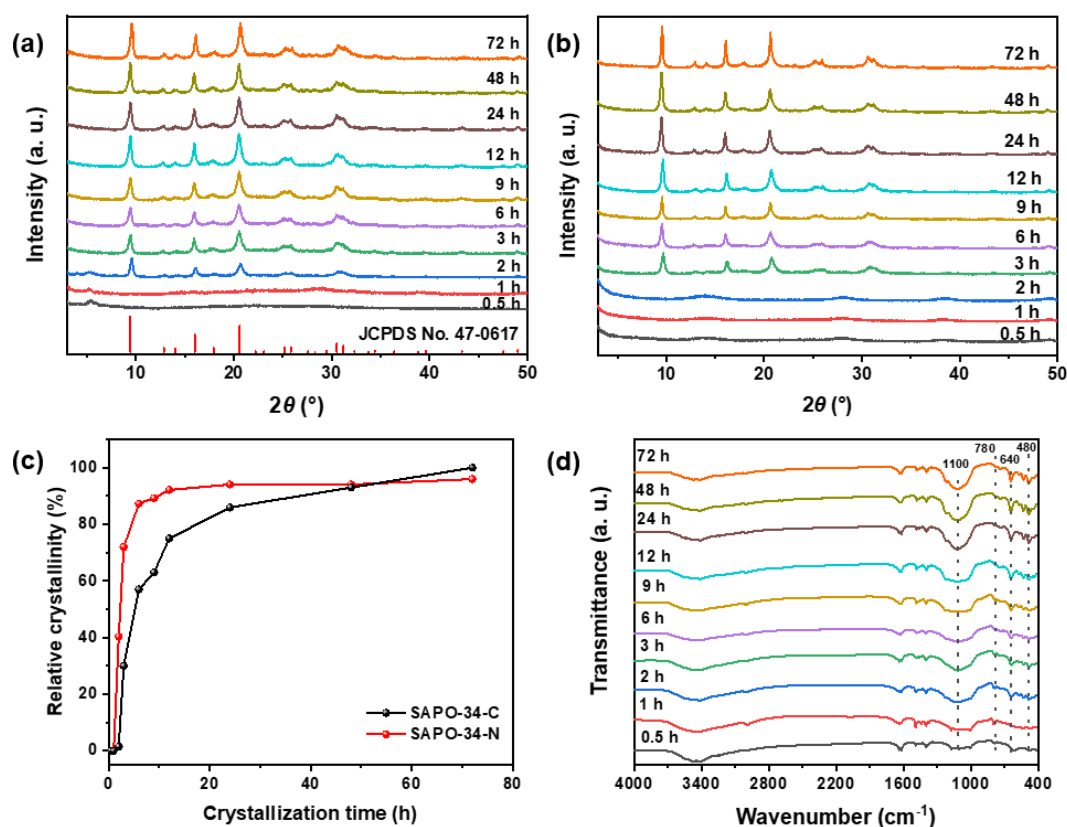

**Fig. S6** XRD patterns of the solid products collected at different time points of SAPO-34-N (a), SAPO-34-C (b), relative crystallinity evolution with crystallization time (c)<sup>a</sup>, and time-dependent FT-IR of SAPO-34-N (d)<sup>b</sup>.

<sup>a</sup> Relative crystallinity calculation based on the area of peaks at  $2\theta = 9.5, 16.0, 20.5, 25.8$  and  $30.50^\circ$ , the relative crystallinity of fully crystallized SAPO-34-C.

<sup>b</sup> All peaks are assigned as follows:  $3650\text{--}3000\text{ cm}^{-1}$  arising from the hydroxyl vibration;  $1300\text{--}1000\text{ cm}^{-1}$  ascribed to the asymmetric stretch of T-O tetrahedra;  $740\text{ cm}^{-1}$  due to the symmetric stretch of T-O tetrahedra; the peaks at  $640\text{ cm}^{-1}$  corresponding to the vibration of double-6 rings.

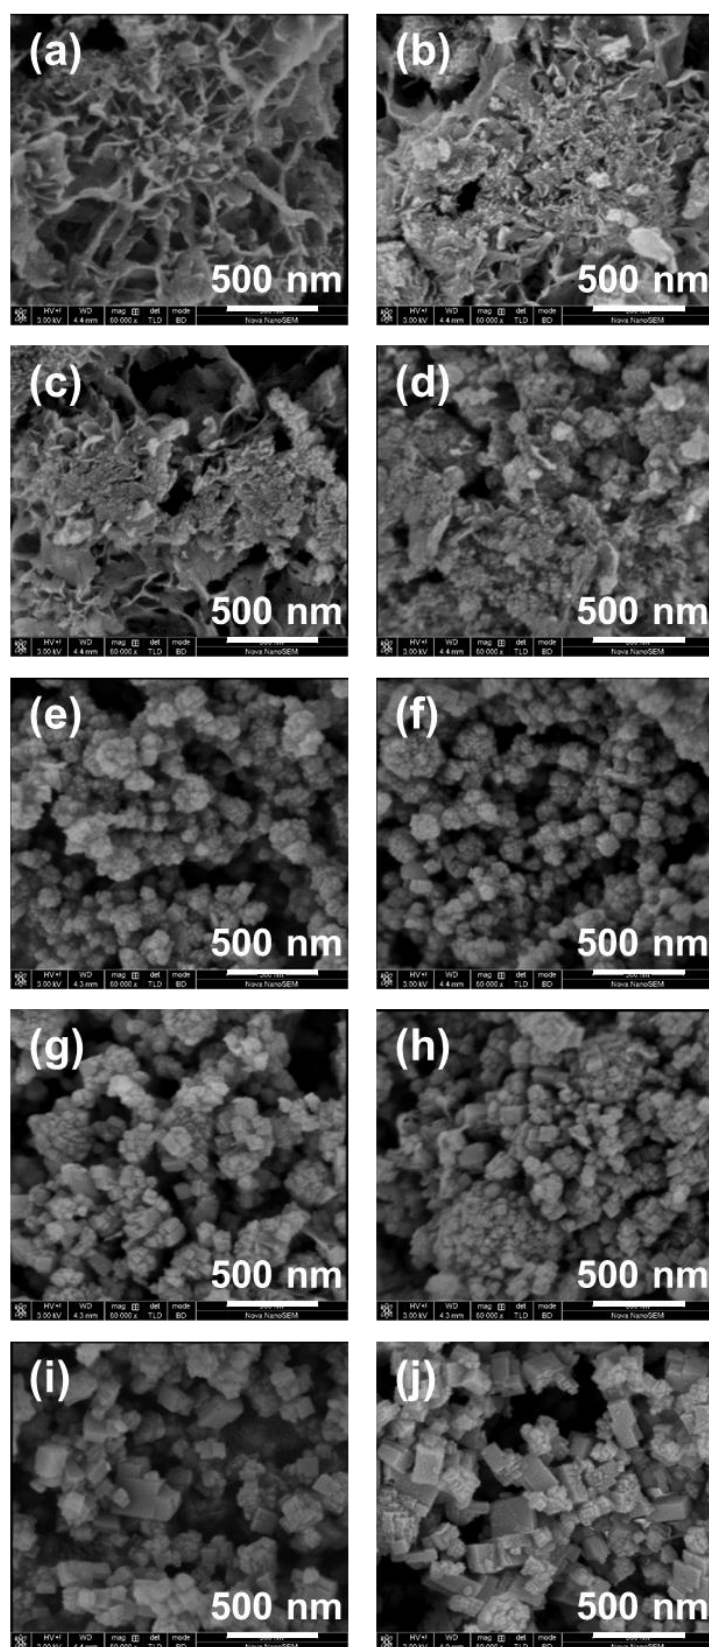

**Fig. S7** SEM images of SAPO-34-C-0.5h (a), SAPO-34-C-1h (b), SAPO-34-C-2h (c), SAPO-34-C-3h (d), SAPO-34-C-6h (e), SAPO-34-C-9h (f), SAPO-34-C-12h (g), SAPO-34-C-24h (h), SAPO-34-C-48h (i), SAPO-34-C-72h (j).

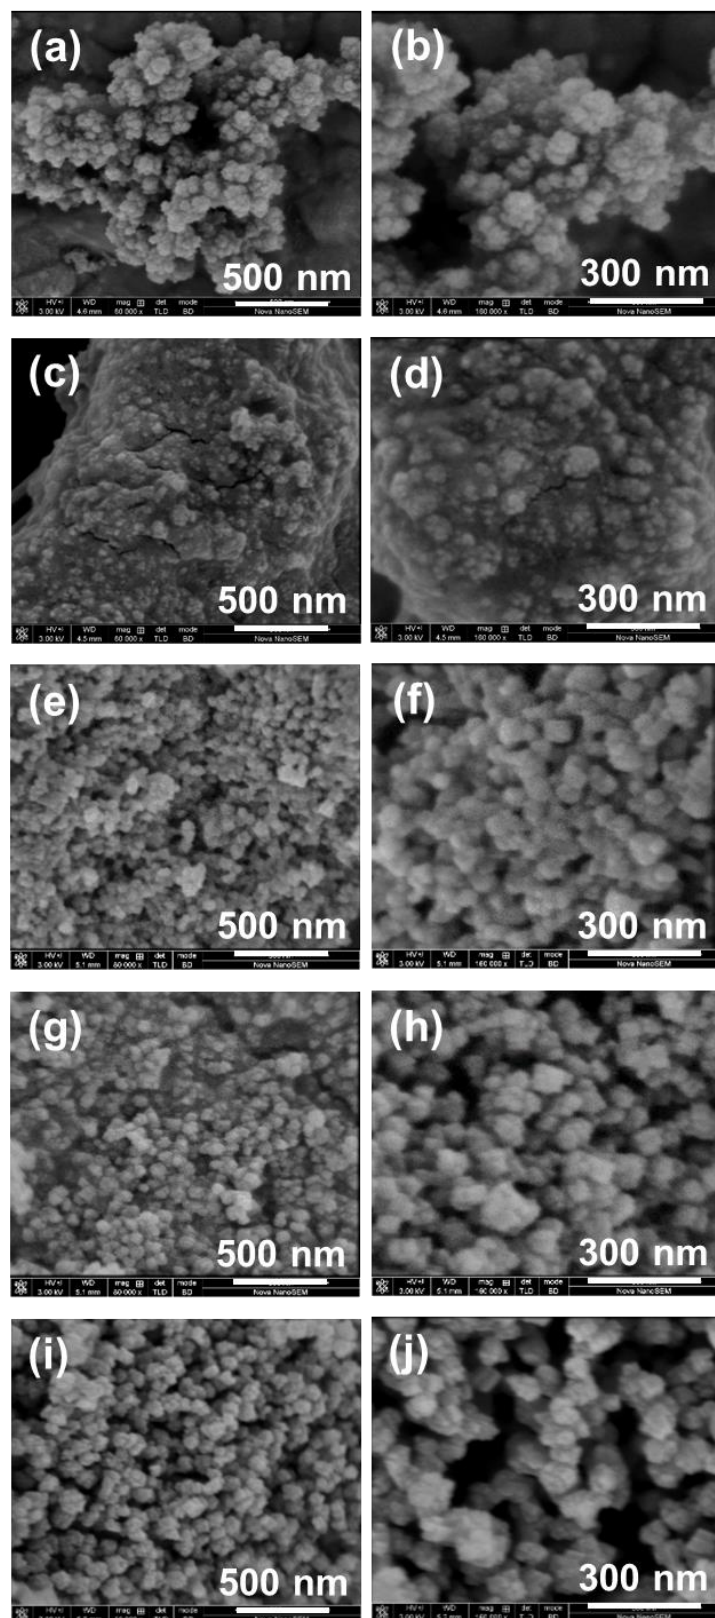

to be continued



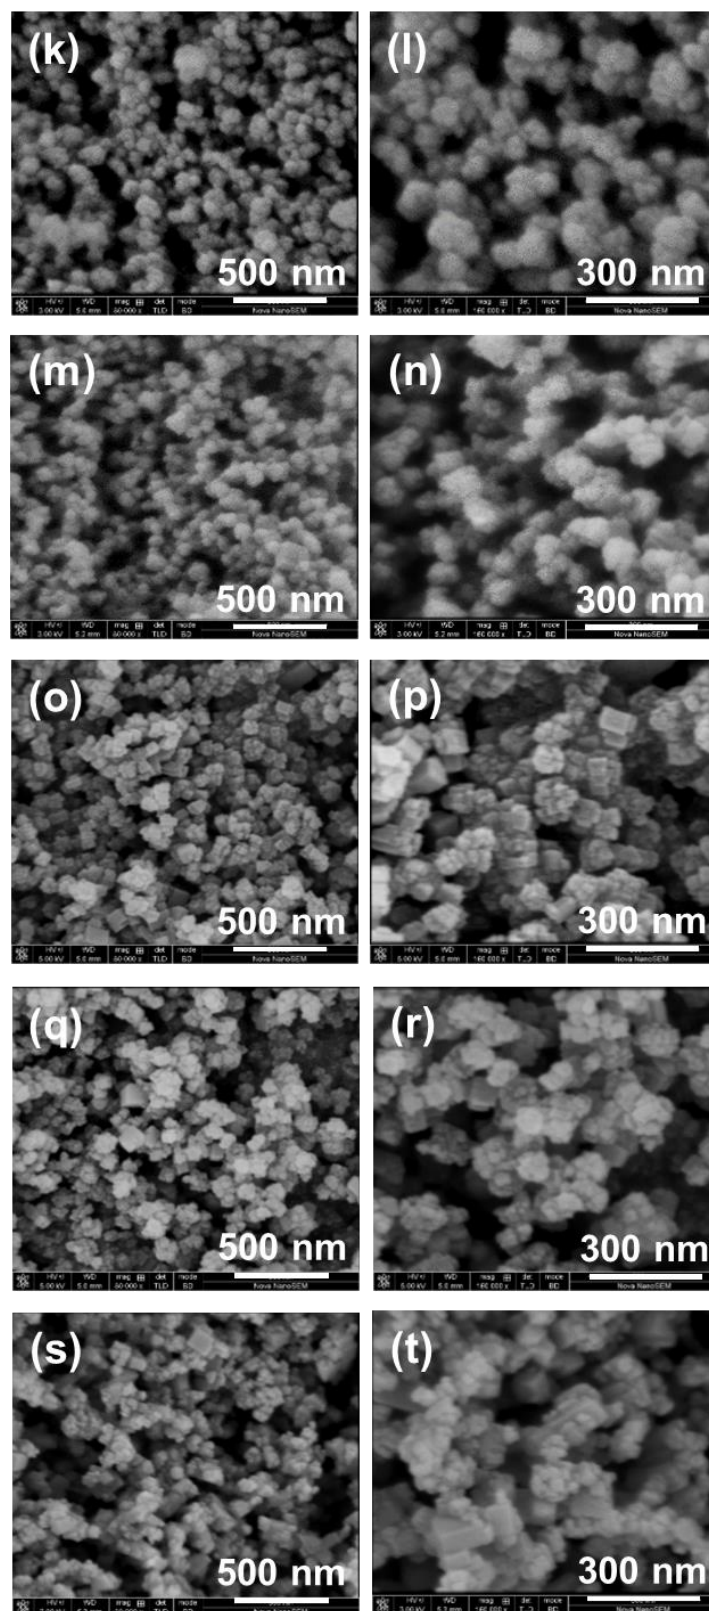

**Fig. S8** SEM images of SAPO-34-N-0.5h (a, b), SAPO-34-N-1h (c, d), SAPO-34-N-2h (e, f), SAPO-34-N-3h (g, h), SAPO-34-N-6h (i, j), SAPO-34-N-9h (k, l), SAPO-34-N-12h (m, n), SAPO-34-N-24h (o, p), SAPO-34-N-48h (q, r), SAPO-34-N-72h (s, t).



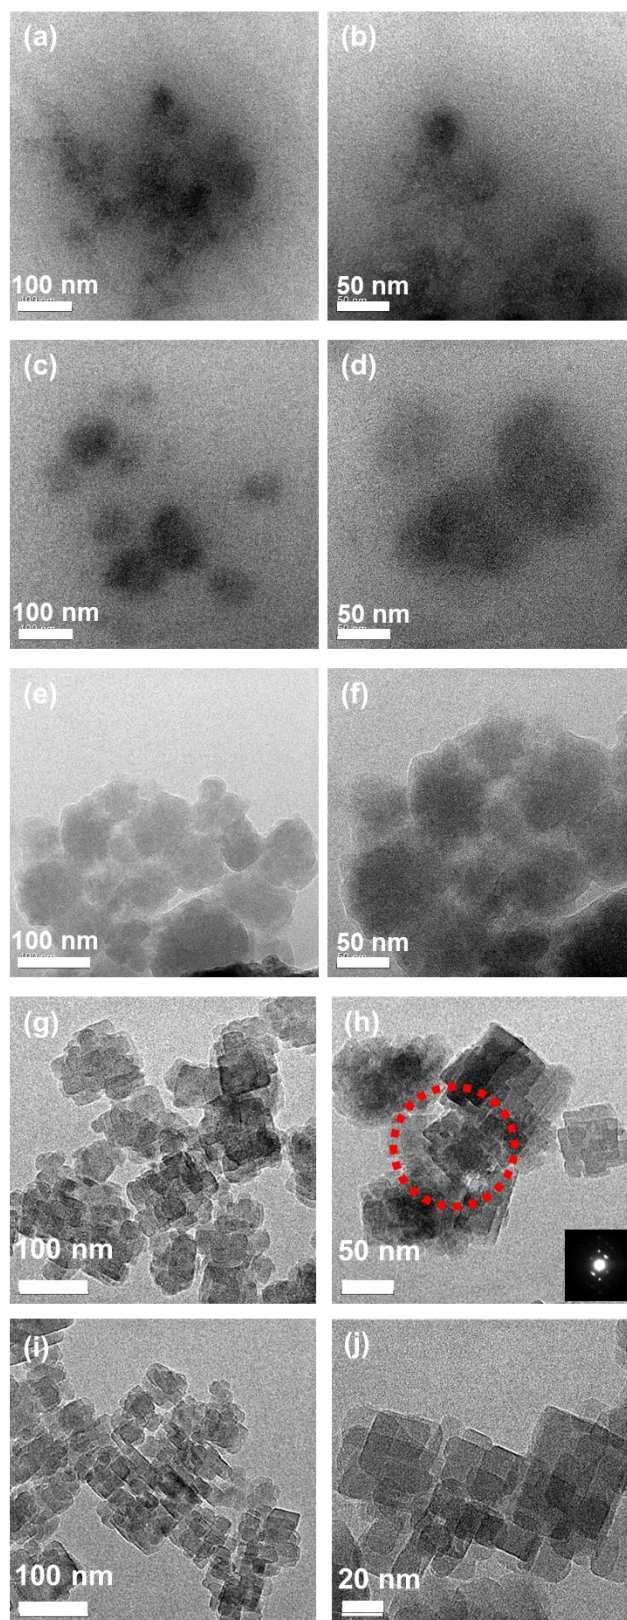

**Fig. S9** TEM images of SAPO-34-N-0.5h (a, b), SAPO-34-N-1h (c, d), SAPO-34-N-2h(e, f), SAPO-34-N-24h(g, h), SAPO-34-N-48h(i, j).

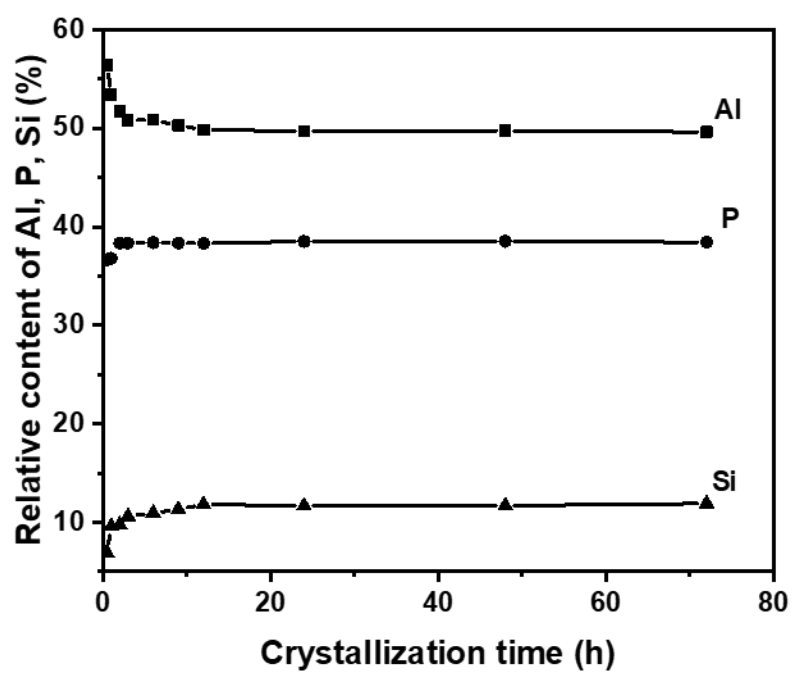

**Fig. S10** Chemical composition variations of inorganic components in solid product during crystallization process

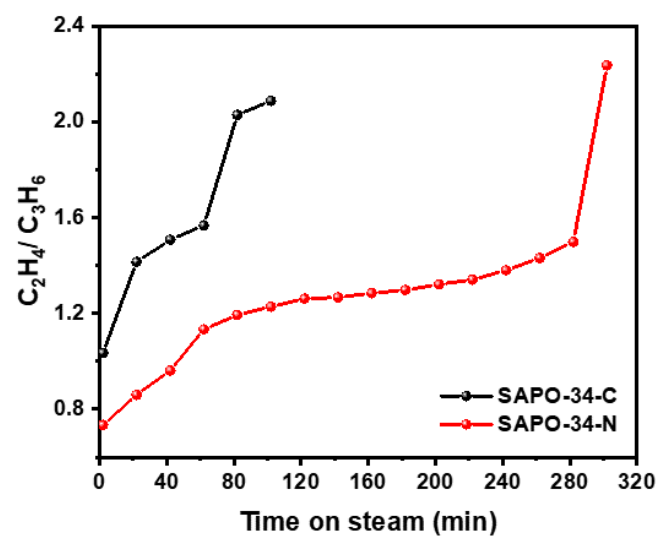

**Fig. S11** Time on stream  $C_2H_4/C_3H_6$  of DTO for SAPO-34-N and SAPO-34-C.

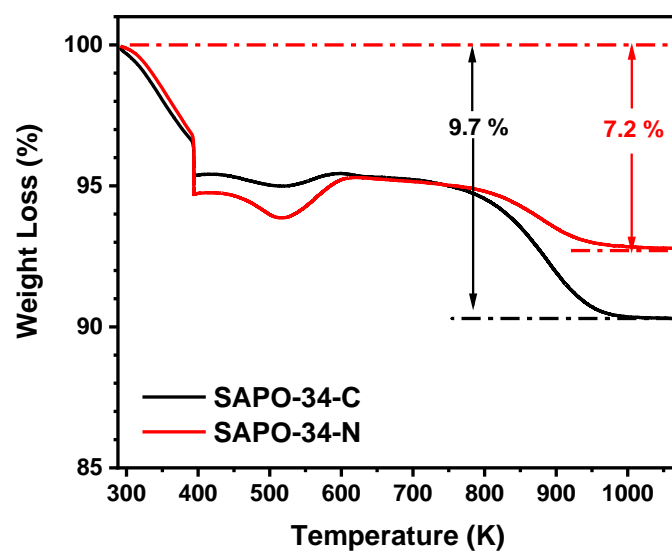

**Fig. S12** Coke amounts determined via Thermal gravimetric analysis (TGA) measurement from spent catalysts.

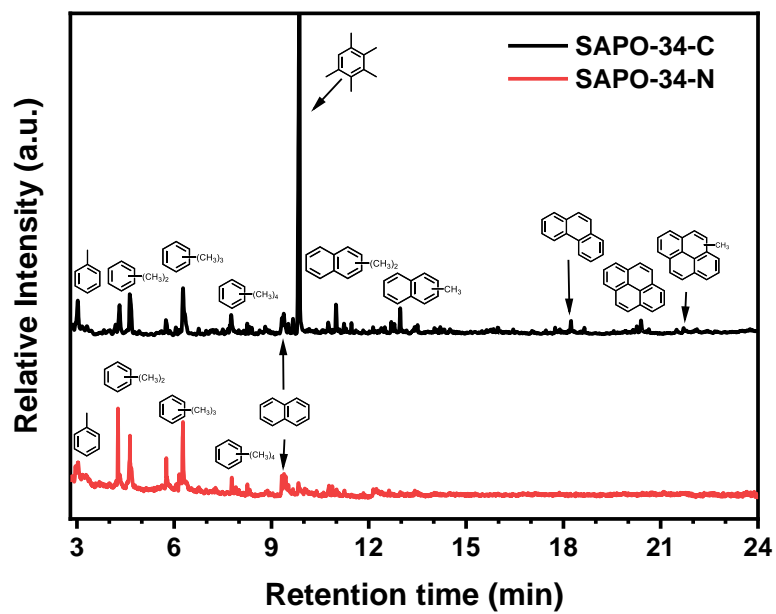

**Fig. S13** GC-MS detection of entrapped hydrocarbon species from spent catalysts after DTO reaction.

**Table S1** Detailed synthetic procedures of all relevant samples.

| Name               | Crystallization condition |                   |                                |                               |                  |       |                  |         |
|--------------------|---------------------------|-------------------|--------------------------------|-------------------------------|------------------|-------|------------------|---------|
|                    | Aluminum source           | Static or dynamic | Molar composition              |                               |                  |       |                  |         |
|                    |                           |                   | Al <sub>2</sub> O <sub>3</sub> | P <sub>2</sub> O <sub>5</sub> | SiO <sub>2</sub> | TEAOH | H <sub>2</sub> O | toluene |
| SAPO-34-C          | AIP                       | Static            | 1                              | 1                             | 0.3              | 2     | 50               | 0       |
| SAPO-34-S-W-T      | AIP                       | Static            | 1                              | 1                             | 0.3              | 2     | 50               | 6.5     |
| SAPO-34-D-W        | AIP                       | Dynamic           | 1                              | 1                             | 0.3              | 2     | 50               | 0       |
| SAPO-34-N          | AIP                       | Dynamic           | 1                              | 1                             | 0.3              | 2     | 50               | 6.5     |
| SAPO-34-PB-D-W     | PB                        | Dynamic           | 1                              | 1                             | 0.3              | 2     | 50               | 0       |
| SAPO-34-PB-D-W-T   | PB                        | Dynamic           | 1                              | 1                             | 0.3              | 2     | 50               | 6.5     |
| SAPO-34 W:T=50:3.2 | AIP                       | Dynamic           | 1                              | 1                             | 0.3              | 2     | 50               | 3.2     |
| SAPO-34 W:T=50:13  | AIP                       | Dynamic           | 1                              | 1                             | 0.3              | 2     | 50               | 13      |
| SAPO-34 W:T=25:6.5 | AIP                       | Dynamic           | 1                              | 1                             | 0.3              | 2     | 25               | 6.5     |

**Table S2** DTO catalytic results of SAPO-34-C and SAPO-34-N catalysts.

| Sample    | TOS<br>(min) | Selectivity (%) |                               |                               |                               |                               |                               |                                |                             |                                                              |
|-----------|--------------|-----------------|-------------------------------|-------------------------------|-------------------------------|-------------------------------|-------------------------------|--------------------------------|-----------------------------|--------------------------------------------------------------|
|           |              | CH <sub>4</sub> | C <sub>2</sub> H <sub>4</sub> | C <sub>2</sub> H <sub>6</sub> | C <sub>3</sub> H <sub>6</sub> | C <sub>3</sub> H <sub>8</sub> | C <sub>4</sub> H <sub>8</sub> | C <sub>4</sub> H <sub>10</sub> | C <sub>5</sub> <sup>+</sup> | C <sub>2</sub> H <sub>4</sub> +C <sub>3</sub> H <sub>6</sub> |
| SAPO-34-C | 22           | 1.13            | 48.05                         | 0.43                          | 33.94                         | 0.63                          | 4.16                          | 6.73                           | 4.88                        | 81.99                                                        |
| SAPO-34-N | 102          | 1.19            | 46.09                         | 0.65                          | 40.65                         | 0.44                          | 2.61                          | 5.06                           | 3.27                        | 86.75                                                        |
